# Supplementary material
Source: Springer Nature journal article supplement (https://www.springermedizin.de/resource/supplementary/13756_2012_18_MOESM1_ESM.pdf/9682250)

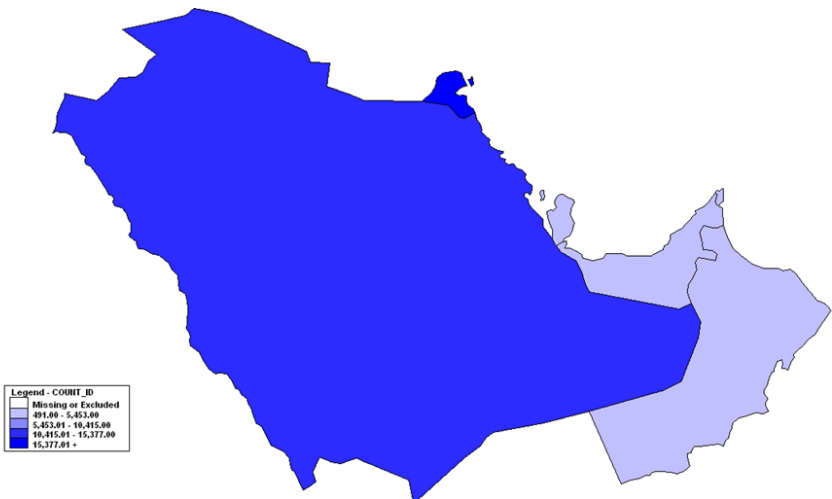

**Total isolates**

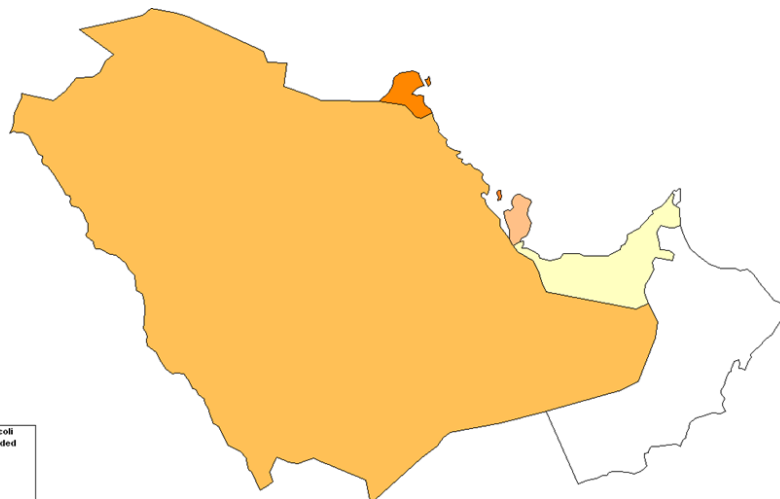

***Escherichia coli***

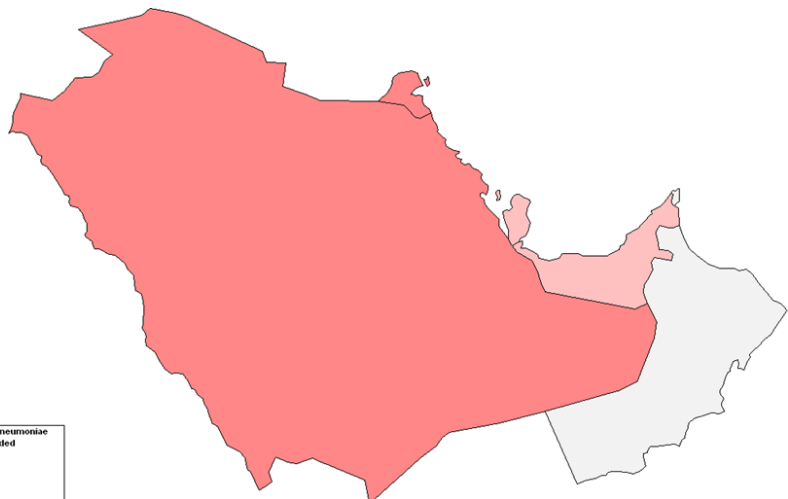

***Klebsiella pneumoniae***

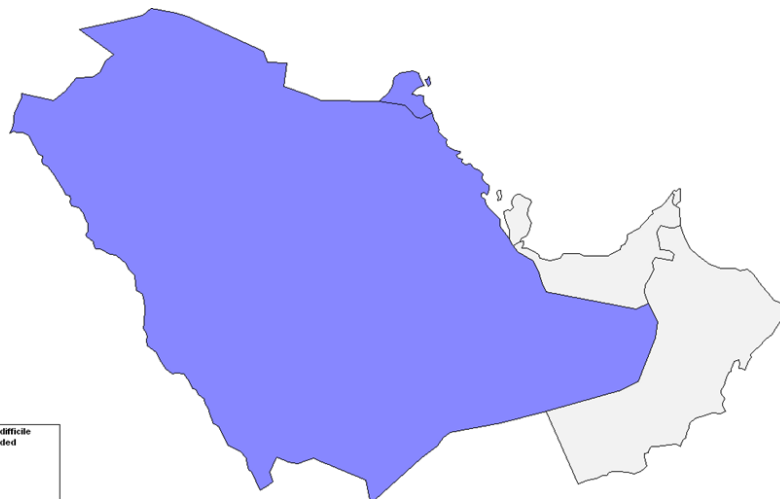

***Clostridium difficile***

Supplement: MOESM1 [file 9682250]
